# Supplementary material for: Exploring the Role of the Plant Actin Cytoskeleton: From Signaling to Cellular Functions
Source: MDPI journal article supplement (doi:10.3390/ijms242015480), 2023-10-23
Supplement: s1 [file s1]

## Supplementary Material

**Supplementary Table S1.** Prediction of subcellular localization of actin-related sequences in different plant species.

| Species                                     | Prediction | No. of prediction studies per compartment |     |     |     |     |     |    |     |     |    |     |
|---------------------------------------------|------------|-------------------------------------------|-----|-----|-----|-----|-----|----|-----|-----|----|-----|
|                                             |            | CYT                                       | CSK | NUC | MIT | PLA | PER | ER | GOL | VAC | PM | EXC |
| <i>Musa acuminata</i>                       | 14         | 14                                        | 0   | 0   | 0   | 0   | 0   | 0  | 0   | 0   | 0  | 0   |
| <i>Hordeum vulgare</i>                      | 1          | 1                                         | 0   | 0   | 0   | 0   | 0   | 0  | 0   | 0   | 0  | 0   |
| <i>Brassica napus</i>                       | 15         | 15                                        | 0   | 0   | 0   | 0   | 0   | 0  | 0   | 0   | 0  | 0   |
| <i>Brassica rapa</i>                        | 6          | 5                                         | 1   | 0   | 0   | 0   | 0   | 0  | 0   | 0   | 0  | 0   |
| <i>Zea mays</i>                             | 39         | 22                                        | 1   | 3   | 0   | 6   | 0   | 1  | 0   | 0   | 4  | 2   |
| <i>Solanum tuberosum</i>                    | 10         | 9                                         | 0   | 0   | 1   | 0   | 0   | 0  | 0   | 0   | 0  | 0   |
| <i>Oryza sativa</i>                         | 2          | 0                                         | 0   | 0   | 0   | 1   | 0   | 0  | 0   | 0   | 1  | 0   |
| <i>Sorghum bicolor</i>                      | 1          | 1                                         | 0   | 0   | 0   | 0   | 0   | 0  | 0   | 0   | 0  | 0   |
| <i>Glycine max</i>                          | 11         | 3                                         | 0   | 2   | 3   | 0   | 0   | 3  | 0   | 0   | 0  | 0   |
| <i>Solanum lycopersicum</i>                 | 5          | 0                                         | 0   | 3   | 0   | 2   | 0   | 0  | 0   | 0   | 0  | 0   |
| <i>Triticum aestivum</i>                    | 3          | 2                                         | 0   | 0   | 0   | 0   | 0   | 0  | 1   | 0   | 0  | 0   |
| <i>Vitis vinifera</i>                       | 2          | 1                                         | 0   | 0   | 0   | 0   | 0   | 0  | 0   | 0   | 0  | 1   |
| Total no. of prediction studies/compartment |            | 73                                        | 2   | 8   | 4   | 9   | 0   | 4  | 1   | 0   | 5  | 3   |

The subcellular localization of proteins highly homologous to *Arabidopsis thaliana* ACT1 (AT2G37620) in other plant species were predicted. The number of distinct prediction studies per species and compartment are shown. The prediction data were obtained from fluorescent protein

(FP), tandem mass spectrometry (MSMS) and related papers in the cropPAL2020 database (cropPAL, <https://croppal.org/>). This platform allows the search for location data across all crop species as well as compares it to Arabidopsis data from SUBA4 (<https://suba.live>). The total number of studies per species, methodology and compartment were determined for reference. CYT, cytosol; CSK, cytoskeleton; ER, endoplasmic reticulum; EXC, extracellular; GOL, Golgi; MIT, mitochondrion; NUC, nucleus; PER, peroxisome; PLA, plastid; PM, plasma membrane; VAC, vacuole.

**Supplementary Table S2.** Prediction of Arabidopsis actin protein subcellular location.

| AGI       | Predictions   | FP      | MS/MS                | PPI       |
|-----------|---------------|---------|----------------------|-----------|
| AT2G37620 | mitochondrion | unclear | cytoskeleton         | AT2G23420 |
|           | cytosol       |         | cytosol              | AT2G37620 |
|           | cytoskeleton  |         | extracellular        | AT3G18780 |
|           | nucleus       |         | Golgi (5x)           | AT3G53750 |
|           |               |         | nucleus (2x)         |           |
|           |               |         | plasma membrane (3x) |           |
|           |               |         | plastid              |           |
|           |               |         | vacuole              |           |
|           |               |         |                      |           |
|           |               |         |                      |           |
| AT3G18780 | cytoskeleton  | vacuole | cytosol              | AT3G46520 |
|           | mitochondrion |         | Golgi (5x)           | AT4G29130 |
|           | nucleus       |         | mitochondrion        | AT4G29130 |
|           | cytosol       |         | nucleus (2x)         | AT5G59880 |
|           |               |         | plasma membrane      |           |
|           |               |         | plastid (2x)         |           |
| AT3G53750 | cytoskeleton  | unclear | extracellular        | AT2G31200 |
|           | mitochondrion |         | mitochondrion        |           |
|           | nucleus       |         | nucleus              |           |
|           | cytosol       |         |                      |           |
| AT5G59370 | cytoskeleton  | unclear | mitochondrion (2x)   |           |
|           | mitochondrion |         |                      |           |
|           | nucleus       |         |                      |           |
|           | cytosol       |         |                      |           |
| AT5G09810 | cytosol       | unclear | cytosol              | AT2G31200 |
|           | cytoskeleton  |         | Golgi (5x)           | AT2G37620 |
|           | nucleus       |         | mitochondrion (2x)   | AT3G12110 |
|           | mitochondrion |         | nucleus (3x)         | AT3G18060 |
|           |               |         | plasma membrane (9x) | AT5G09810 |
|           |               |         | plastid (3x)         |           |
|           |               |         | vacuole (2x)         |           |
|           |               |         |                      |           |
| AT1G49240 | nucleus       | unclear | cytosol (2x)         | AT1G72770 |
|           | cytoskeleton  |         | extracellular        |           |
|           | mitochondrion |         | Golgi (3x)           |           |
|           | cytosol       |         | nucleus (2x)         |           |
|           |               |         | peroxisome           |           |
|           |               |         | plasma membrane (5x) |           |
|           |               |         | plastid (4x)         |           |
|           |               |         | vacuole (2x)         |           |

**Supplementary Table S2.** (continued). Prediction of Arabidopsis actin protein subcellular location.

| <b>AGI</b> | <b>Predictions</b>                                  | <b>FP</b> | <b>MS/MS</b>                                                                                                   | <b>PPI</b>                          |
|------------|-----------------------------------------------------|-----------|----------------------------------------------------------------------------------------------------------------|-------------------------------------|
| AT3G12110  | nucleus<br>cytoskeleton<br>mitochondrion<br>cytosol | unclear   | cytoskeleton<br>Golgi (3x)<br>mitochondrion (2x)<br>nucleus<br>plasma membrane (3x)<br>plastid (2x)<br>vacuole | AT3G18780                           |
| AT3G46520  | cytoskeleton<br>mitochondrion<br>nucleus<br>cytosol | unclear   | mitochondrion<br>nucleus<br>plasma membrane (2x)<br>plastid (3x)                                               | AT2G31200<br>AT3G18060<br>AT5G09810 |

SUBA (<https://suba.live>) provides a subcellular data query platform, protein sequence BLAST alignment, high-confidence subcellular location reference standards, and analytic tools. Concrete data are collected from the query results of actin proteins on the SUBA platform. AGI, Arabidopsis gene identifier; Predictions, Location prediction summary. Any locations predicted by at least one predictor is shown; FP, Localization summary as determined by fluorescent protein assay; PPI, Protein-protein interactions and the SUBAcon location classification of each interacting protein; MS/MS, Localization summary as determined by mass spectrometry. The values in parentheses represent the intensities of the main fragment ions.
